# Supplementary material for: A virome-wide clonal integration analysis platform for discovering cancer viral etiology
Source: HighWire-hosted journal article supplement (doi:10.1101/gr.242529.118), 2019-03-14
Supplement: Supplemental_Table_S5.xlsx [file Supplemental_Table_S5.xlsx]

## Sheet: Supplemental Table S5
Supplemental Table S5 Viral integration format file
Column	Header	Description
Col 1	Sample_ID	Sample ID
Col 2	VIcaller_mode	Vicaller running mode
Col 3	QC	If low quality nucleotide and reads were filtered
Col 4	Reciprocal_alignment	If the reads were reciprocal aligned back to the human reference genome
Col 5	Candidate_virus	Virus name
Col 6	Accession.number	The selected, top one accession number for the integration
Col 7	Chr.	Human chromosome ID
Col 8	Start	Start position of the span genomic region of all chimeric and split reads in the human reference genome
Col 9	End	End position of the span genomic region of all chimeric and split reads in the human reference genome
Col 10	No._chimeric_reads	Total count of chimeric reads of the integration
Col 11	No._split_reads	Total count of split reads of the integration
Col 12	Upstream_breakpoint_on_human	Upstream breakpoint detected in the human reference genome
Col 13	Downstream_breakpoint_on_human	Downstream breakpoint detected in the human reference genome
Col 14	Upstream_breakpoint_on_virus	Upstream breakpoint detected in the viral genome
Col 15	Downstream_breakpoint_on_virus	Downstream breakpoint detected in the viral genome
Col 16	Information_of_both_upstream_and_downstream_breakpoints	Upstream and downstream breakpoint information. Upstream and downstream breakpoints were separated by semicolon; "D" and "E" represent if this breakpoint is detected by split reads (D), or estimated by chimeric reads separately (E); "+" and "-", represent the forward and reverse direction for both human (left) and virus (right) genome in the square per breakpoint; "na" represent this breakpint is…
Col 17	Integration_site_in_the_human_genome	Integration site in the human genome that was used for allele fraction detection. If both upstream and downstream breakpoints were detected, the medium position was used; If either one of the breakpoints were detected by split reads, this postion detected by split reads was used.
Col 18	Integration_allele_fraction	Integration allele fraction value
Col 19	No._reads_supporting_nonVI	No. reads support no viral integration
Col 20	No._reads_supporting_VI	No. reads support viral integration, including chimeric and split reads
Col 21	Average alignment score	Average alignment score (AS) of reads support viral integration, including chimeric and split reads
Col 22	Validation_chimeric_confident	In silico validation, the number of chimeric reads were consistently validated using Blastn, Blat and BWA-MEM
Col 23	Validation_chimeric_weak	In silico validation, the number of chimeric reads were validated by some but not all tools, including Blastn, Blat and BWA-MEM
Col 24	Validation_chimeric_false	In silico validation, the number of chimeric reads were false after validation
Col 25	Validation_split_confident	In silico validation, the number of split reads were consistently validated using Blastn, Blat and BWA-MEM
Col 26	Validation_split_weak	In silico validation, the number of split reads were validated by some but not all tools, including Blastn, Blat and BWA-MEM
Col 27	Validation_split_false	In silico validation, the number of split reads were false after validation
