# Supplementary material for: A virome-wide clonal integration analysis platform for discovering cancer viral etiology
Source: HighWire-hosted journal article supplement (doi:10.1101/gr.242529.118), 2019-03-14
Supplement: Supplemental_Table_S10.xlsx [file Supplemental_Table_S10.xlsx]

## Sheet: Supplemental Table S10
Supplemental Table S10 Comparison of viral integration detection power and precision among VIcaller and three of the commonly used tools (Virus-Clip, VirusSeq, and VirusFinder2)
Simulated viral integrations	Depth (×)	Simulated integration allele fraction	Candidate viral integration detection		Virome-wide viral integration detection
			Virus-Clip		VirusFinder*		VirusSeq		VIcaller
			Detection power	Precision	Detection power	Precision	Detection power	Precision	Detection power	Precision
10 HPV integrations	5	5	0	-	0	-	0	-	0.2	1
10 HPV integrations	5	25	0.4	1	0.2	1	0.5	1	0.9	1
10 HPV integrations	5	50	0.8	1	0.8	1	1	1	1	1
10 HPV integrations	5	100	1	1	0.1	1	1	1	1	1
10 HPV integrations	30	5	0.4	1	0.3	1	Unfinish	Unfinish	0.9	1
10 HPV integrations	30	25	1	1	0.7	1	1	1	1	1
10 HPV integrations	30	50	1	1	0.9	1	Unfinish	Unfinish	1	1
10 HPV integrations	30	100	1	1	1	1	Unfinish	Unfinish	1	1
10 HPV integrations	60	5	0.7	0.875	0.9	1	Unfinish	Unfinish	0.9	1
10 HPV integrations	60	25	1	1	1	1	Unfinish	Unfinish	1	1
10 HPV integrations	60	50	1	1	1	1	Unfinish	Unfinish	1	1
10 HPV integrations	60	100	1	1	Failed	-	Unfinish	Unfinish	1	1
90 Virome-wide integrations	5	5	Not applicable	Not applicable	Not applicable	Not applicable	0	-	0.188889	1
90 Virome-wide integrations	5	25	Not applicable	Not applicable	Not applicable	Not applicable	0	-	0.888889	1
90 Virome-wide integrations	5	50	Not applicable	Not applicable	Not applicable	Not applicable	0	-	0.944444	1
90 Virome-wide integrations	5	100	Not applicable	Not applicable	Not applicable	Not applicable	0.0111111	1	1	1
90 Virome-wide integrations	30	5	Not applicable	Not applicable	Not applicable	Not applicable	Unfinish	Unfinish	0.911111	1
90 Virome-wide integrations	30	25	Not applicable	Not applicable	Not applicable	Not applicable	Unfinish	Unfinish	1	1
90 Virome-wide integrations	30	50	Not applicable	Not applicable	Not applicable	Not applicable	0.0111111	1	1	1
90 Virome-wide integrations	30	100	Not applicable	Not applicable	Not applicable	Not applicable	Unfinish	Unfinish	1	1
90 Virome-wide integrations	60	5	Not applicable	Not applicable	Not applicable	Not applicable	Unfinish	Unfinish	1	1
90 Virome-wide integrations	60	25	Not applicable	Not applicable	Not applicable	Not applicable	Unfinish	Unfinish	1	1
90 Virome-wide integrations	60	50	Not applicable	Not applicable	Not applicable	Not applicable	Unfinish	Unfinish	1	1
90 Virome-wide integrations	60	100	Not applicable	Not applicable	Not applicable	Not applicable	Unfinish	Unfinish	1	1
Note: VirusSeq ran out of sever wall time at 60× sequencing depth, and it is only capable of detecting less than 20 human viruses. VirusFinder and Virus-Clip were not applicable for analyzing data containing virome-wide integrations.
*, VirusFinder was forced to use our virome-wide reference genome library. But users still need to specify the viral genomes to call integrations in the next step; and it is not applicable for detecting virome-wide integrations.
