# Supplementary material for: A virome-wide clonal integration analysis platform for discovering cancer viral etiology
Source: HighWire-hosted journal article supplement (doi:10.1101/gr.242529.118), 2019-03-14
Supplement: Supplemental_Table_S17.xlsx [file Supplemental_Table_S17.xlsx]

## Sheet: Supplemental Table S17
Supplemental Table S17 Adeno associated virus (AAV or AAV-like) integrations detected in two liver cancer samples
Sample ID	Tissue type	Chr.	Virus name	Accession number	Upstream breakpoint on human	Downstream breakpoint on human	Upstream breakpoint on virus	Downstream breakpoint on virus	Information of both upstream and downstream breakpoints*	No. reads supporting VI detected by VIcaller	No. reads supporting nonVI	Integration allele fraction
55T	Tumor	12	Adeno Associated Virus	AF028704.1	84140373	84140375	54	267	D(+-) ; D(-+)	13	68	0.0872483
70N	Normal	15	Adeno Associated Virus	AY695371.1	44773533	44773626	553	1170	E(+-) ; E(--)	2	167	0.006
* Upstream and downstream breakpoints were separated by semicolon; "D" and "E" represent if this breakpoint is detected by split reads (D), or estimated by chimeric reads separately (E); "+" and "-", represent the forward and reverse direction for both human (left) and virus (right) genome in the square per breakpoint; "na" represent this breakpint is not covered by any chimeric and split reads.
