# Supplementary material for: A virome-wide clonal integration analysis platform for discovering cancer viral etiology
Source: HighWire-hosted journal article supplement (doi:10.1101/gr.242529.118), 2019-03-14
Supplement: Supplemental_Table_S18.xlsx [file Supplemental_Table_S18.xlsx]

## Sheet: Supplemental Table S18A
Supplemental Table S18A HBV integrations in TERT containing at least one HBV enhancer or promoter
Sample ID	Integration event	Enh1 (970-1200 bp)	XP (1173-1363 bp)	CP (1615-1851 bp)	Enh2 (1635-1714 bp)	SP1 (2720-2810 bp)	SP2 (2985-3182 bp)	No. enhancers or promoters contained in each integrated HBV genome
92T	Chr5:1295607	-	-	Yes	-	Yes	Yes	3
29T	Chr5:1295175	-	Yes	Yes	Yes	Yes	Yes	5
81T	Chr5:1295739	Yes	Yes	Yes	-	Yes	Yes	5
261T	Chr5:1295684	Yes	Yes	Yes	-	Yes	Yes	5
266T	Chr5:1295436	Yes	Yes	Yes	Yes	-	Yes	5
198T	Chr5:1269397	Yes	Yes	Yes	Yes	-	-	4
14T	Chr5:1295557	-	-	Yes	-	-	-	1
268T	Chr5:1292404	-	-	-	-	Yes	Yes	2
13T	Chr5:1285514	Yes	Yes	Yes	Yes	-	-	4
58T	Chr5:1295264	-	Yes	Yes	Yes	Yes	-	4
65T	Chr5:1298958	-	-	Yes	-	-	-	1
64T	Chr5:1307431	-	-	-	-	-	-	0
38T	Chr5:1319148	-	-	-	-	-	-	0
63T	Chr5:1296260	-	-	-	-	-	-	0
34T	Chr5:1295375	-	-	-	-	-	-	0
22T	Chr5:1295167	-	-	-	-	-	-	0
126T	Chr5:1295113	-	-	-	-	-	Yes	1
73T	Chr5:1297793	-	-	-	-	-	Yes	1
34T	Chr5:1297640	-	-	-	-	-	Yes	1
46T	Chr5:1295411	-	-	-	-	-	-	0
87T	Chr5:1297391	Yes	-	-	-	-	-	1
65T	Chr5:1295442	Yes	Yes	-	-	-	-	2
36T	Chr5:1295451	-	-	Yes	Yes	-	-	2
38T	Chr5:1295724	-	-	Yes	Yes	-	-	2
60T	Chr5:1295619	-	-	Yes	Yes	-	-	2
60T	Chr5:1295517	-	-	Yes	Yes	-	-	2
64T	Chr5:1299593	-	-	Yes	Yes	-	-	2
73T	Chr5:1295176	-	-	Yes	Yes	-	-	2
267T	Chr5:1295848	-	-	-	-	Yes	Yes	2
No. integrations containing each enhancer or promoter	-	7	8	16	11	7	10	23 (29) = 80%
Note: For HBV integrations with only one breakpoint identified, a windows of 200 bp after upstream breakpoint or 200 bp before downstream breakpoint was used to represent the integrated virus genome length.
A 200 bp window was used to estimated the undetected breakpoint.

## Sheet: Supplemental Table S18B
Supplemental Table S18B HBV integrations in TERT containing at least one HBV enhancer or promoter
Sample ID	Integration event	Enh1 (970-1200 bp)	XP (1173-1363 bp)	CP (1615-1851 bp)	Enh2 (1635-1714 bp)	SP1 (2720-2810 bp)	SP2 (2985-3182 bp)	No. enhancers or promoters contained in each integrated HBV genome
92T	Chr5:1295607	-	-	Yes	-	Yes	Yes	3
29T	Chr5:1295175	-	Yes	Yes	Yes	Yes	Yes	5
81T	Chr5:1295739	Yes	Yes	Yes	-	Yes	Yes	5
261T	Chr5:1295684	Yes	Yes	Yes	-	Yes	Yes	5
266T	Chr5:1295436	Yes	Yes	Yes	Yes	-	Yes	5
198T	Chr5:1269397	Yes	Yes	Yes	Yes	-	-	4
14T	Chr5:1295557	-	-	Yes	-	-	-	1
268T	Chr5:1292404	-	-	-	-	Yes	Yes	2
13T	Chr5:1285514	Yes	Yes	Yes	Yes	-	-	4
58T	Chr5:1295264	-	Yes	Yes	Yes	Yes	-	4
65T	Chr5:1298958	-	-	Yes	Yes	Yes	Yes	4
64T	Chr5:1307431	-	-	-	-	Yes	Yes	2
38T	Chr5:1319148	-	-	-	-	Yes	Yes	2
63T	Chr5:1296260	-	-	-	-	Yes	Yes	2
34T	Chr5:1295375	-	-	-	-	Yes	Yes	2
22T	Chr5:1295167	-	-	-	-	Yes	Yes	2
126T	Chr5:1295113	Yes	-	-	-	-	Yes	2
73T	Chr5:1297793	Yes	-	-	-	-	Yes	2
34T	Chr5:1297640	Yes	-	-	-	-	Yes	2
46T	Chr5:1295411	-	-	-	-	Yes	Yes	2
87T	Chr5:1297391	Yes	-	-	-	-	Yes	2
65T	Chr5:1295442	Yes	Yes	-	-	-	-	2
36T	Chr5:1295451	Yes	Yes	Yes	Yes	-	-	4
38T	Chr5:1295724	Yes	Yes	Yes	Yes	-	-	4
60T	Chr5:1295619	Yes	Yes	Yes	Yes	-	-	4
60T	Chr5:1295517	Yes	Yes	Yes	Yes	-	-	4
64T	Chr5:1299593	Yes	Yes	Yes	Yes	-	-	4
73T	Chr5:1295176	Yes	Yes	Yes	Yes	-	-	4
267T	Chr5:1295848	-	-	Yes	-	Yes	Yes	3
No. integrations containing each enhancer or promoter	-	16	14	17	12	14	18	29 (29) = 100%
Note: For HBV integrations with only one breakpoint identified, a windows of average integrated genome length of 1227 bp after upstream breakpoint or before downstream breakpoint was used to represent the integrated virus genome length.
The average integrated genome length (1,227 bp) was used to estimated the undetected breakpoint.
