# Supplementary material for: A virome-wide clonal integration analysis platform for discovering cancer viral etiology
Source: HighWire-hosted journal article supplement (doi:10.1101/gr.242529.118), 2019-03-14
Supplement: Supplemental_Table_S19.xlsx [file Supplemental_Table_S19.xlsx]

## Sheet: Supplemental Table S19
Supplemental Table S19 List of tumor and matched normal tissues (for viral integration positive samples) of 106 analyzed TCGA bladder cancer samples
Project ID	Disease type	Submitter id	Sample submitter id	Primary site	Tissue type
BLCA	Bladder Urothelial Carcinoma	TCGA-BL-A0C8	TCGA-BL-A0C8-01A	Bladder	Primary Tumor
BLCA	Bladder Urothelial Carcinoma	TCGA-BL-A13J	TCGA-BL-A13J-01A	Bladder	Primary Tumor
BLCA	Bladder Urothelial Carcinoma	TCGA-BL-A3JM	TCGA-BL-A3JM-01A	Bladder	Primary Tumor
BLCA	Bladder Urothelial Carcinoma	TCGA-BT-A0S7	TCGA-BT-A0S7-01A	Bladder	Primary Tumor
BLCA	Bladder Urothelial Carcinoma	TCGA-BT-A0YX	TCGA-BT-A0YX-01A	Bladder	Primary Tumor
BLCA	Bladder Urothelial Carcinoma	TCGA-BT-A20O	TCGA-BT-A20O-01A	Bladder	Primary Tumor
BLCA	Bladder Urothelial Carcinoma	TCGA-BT-A20P	TCGA-BT-A20P-01A	Bladder	Primary Tumor
BLCA	Bladder Urothelial Carcinoma	TCGA-BT-A20Q	TCGA-BT-A20Q-01A	Bladder	Primary Tumor
BLCA	Bladder Urothelial Carcinoma	TCGA-BT-A20R	TCGA-BT-A20R-01A	Bladder	Primary Tumor
BLCA	Bladder Urothelial Carcinoma	TCGA-BT-A20T	TCGA-BT-A20T-01A	Bladder	Primary Tumor
BLCA	Bladder Urothelial Carcinoma	TCGA-BT-A20U	TCGA-BT-A20U-01A	Bladder	Primary Tumor
BLCA	Bladder Urothelial Carcinoma	TCGA-BT-A20V	TCGA-BT-A20V-01A	Bladder	Primary Tumor
BLCA	Bladder Urothelial Carcinoma	TCGA-BT-A20V	TCGA-BT-A20V-11A	Bladder	Solid Tissue Normal
BLCA	Bladder Urothelial Carcinoma	TCGA-BT-A20W	TCGA-BT-A20W-01A	Bladder	Primary Tumor
BLCA	Bladder Urothelial Carcinoma	TCGA-BT-A20X	TCGA-BT-A20X-01A	Bladder	Primary Tumor
BLCA	Bladder Urothelial Carcinoma	TCGA-BT-A2LA	TCGA-BT-A2LA-01A	Bladder	Primary Tumor
BLCA	Bladder Urothelial Carcinoma	TCGA-BT-A2LB	TCGA-BT-A2LB-01A	Bladder	Primary Tumor
BLCA	Bladder Urothelial Carcinoma	TCGA-BT-A2LD	TCGA-BT-A2LD-01A	Bladder	Primary Tumor
BLCA	Bladder Urothelial Carcinoma	TCGA-BT-A3PH	TCGA-BT-A3PH-01A	Bladder	Primary Tumor
BLCA	Bladder Urothelial Carcinoma	TCGA-BT-A3PJ	TCGA-BT-A3PJ-01A	Bladder	Primary Tumor
BLCA	Bladder Urothelial Carcinoma	TCGA-BT-A3PK	TCGA-BT-A3PK-01A	Bladder	Primary Tumor
BLCA	Bladder Urothelial Carcinoma	TCGA-C4-A0F6	TCGA-C4-A0F6-01A	Bladder	Primary Tumor
BLCA	Bladder Urothelial Carcinoma	TCGA-C4-A0F7	TCGA-C4-A0F7-01A	Bladder	Primary Tumor
BLCA	Bladder Urothelial Carcinoma	TCGA-CF-A1HR	TCGA-CF-A1HR-01A	Bladder	Primary Tumor
BLCA	Bladder Urothelial Carcinoma	TCGA-CF-A1HS	TCGA-CF-A1HS-01A	Bladder	Primary Tumor
BLCA	Bladder Urothelial Carcinoma	TCGA-CF-A27C	TCGA-CF-A27C-01A	Bladder	Primary Tumor
BLCA	Bladder Urothelial Carcinoma	TCGA-CF-A3MF	TCGA-CF-A3MF-01A	Bladder	Primary Tumor
BLCA	Bladder Urothelial Carcinoma	TCGA-CF-A3MG	TCGA-CF-A3MG-01A	Bladder	Primary Tumor
BLCA	Bladder Urothelial Carcinoma	TCGA-CF-A3MH	TCGA-CF-A3MH-01A	Bladder	Primary Tumor
BLCA	Bladder Urothelial Carcinoma	TCGA-CF-A3MI	TCGA-CF-A3MI-01A	Bladder	Primary Tumor
BLCA	Bladder Urothelial Carcinoma	TCGA-CU-A0YN	TCGA-CU-A0YN-01A	Bladder	Primary Tumor
BLCA	Bladder Urothelial Carcinoma	TCGA-CU-A0YO	TCGA-CU-A0YO-01A	Bladder	Primary Tumor
BLCA	Bladder Urothelial Carcinoma	TCGA-CU-A0YR	TCGA-CU-A0YR-01A	Bladder	Primary Tumor
BLCA	Bladder Urothelial Carcinoma	TCGA-CU-A3KJ	TCGA-CU-A3KJ-01A	Bladder	Primary Tumor
BLCA	Bladder Urothelial Carcinoma	TCGA-CU-A3QU	TCGA-CU-A3QU-01A	Bladder	Primary Tumor
BLCA	Bladder Urothelial Carcinoma	TCGA-CU-A3YL	TCGA-CU-A3YL-01A	Bladder	Primary Tumor
BLCA	Bladder Urothelial Carcinoma	TCGA-DK-A1A3	TCGA-DK-A1A3-01A	Bladder	Primary Tumor
BLCA	Bladder Urothelial Carcinoma	TCGA-DK-A1A5	TCGA-DK-A1A5-01A	Bladder	Primary Tumor
BLCA	Bladder Urothelial Carcinoma	TCGA-DK-A1A6	TCGA-DK-A1A6-01A	Bladder	Primary Tumor
BLCA	Bladder Urothelial Carcinoma	TCGA-DK-A1A7	TCGA-DK-A1A7-01A	Bladder	Primary Tumor
BLCA	Bladder Urothelial Carcinoma	TCGA-DK-A1AA	TCGA-DK-A1AA-01A	Bladder	Primary Tumor
BLCA	Bladder Urothelial Carcinoma	TCGA-DK-A1AB	TCGA-DK-A1AB-01A	Bladder	Primary Tumor
BLCA	Bladder Urothelial Carcinoma	TCGA-DK-A1AD	TCGA-DK-A1AD-01A	Bladder	Primary Tumor
BLCA	Bladder Urothelial Carcinoma	TCGA-DK-A1AE	TCGA-DK-A1AE-01A	Bladder	Primary Tumor
BLCA	Bladder Urothelial Carcinoma	TCGA-DK-A1AG	TCGA-DK-A1AG-01A	Bladder	Primary Tumor
BLCA	Bladder Urothelial Carcinoma	TCGA-DK-A2HX	TCGA-DK-A2HX-01A	Bladder	Primary Tumor
BLCA	Bladder Urothelial Carcinoma	TCGA-DK-A2I1	TCGA-DK-A2I1-01A	Bladder	Primary Tumor
BLCA	Bladder Urothelial Carcinoma	TCGA-DK-A2I2	TCGA-DK-A2I2-01A	Bladder	Primary Tumor
BLCA	Bladder Urothelial Carcinoma	TCGA-DK-A3IK	TCGA-DK-A3IK-01A	Bladder	Primary Tumor
BLCA	Bladder Urothelial Carcinoma	TCGA-DK-A3IL	TCGA-DK-A3IL-01A	Bladder	Primary Tumor
BLCA	Bladder Urothelial Carcinoma	TCGA-DK-A3IM	TCGA-DK-A3IM-01A	Bladder	Primary Tumor
BLCA	Bladder Urothelial Carcinoma	TCGA-DK-A3IN	TCGA-DK-A3IN-01A	Bladder	Primary Tumor
BLCA	Bladder Urothelial Carcinoma	TCGA-DK-A3IQ	TCGA-DK-A3IQ-01A	Bladder	Primary Tumor
BLCA	Bladder Urothelial Carcinoma	TCGA-DK-A3IT	TCGA-DK-A3IT-01A	Bladder	Primary Tumor
BLCA	Bladder Urothelial Carcinoma	TCGA-DK-A3IT	TCGA-DK-A3IT-10A	Bladder	Blood Derived Normal
BLCA	Bladder Urothelial Carcinoma	TCGA-DK-A3IV	TCGA-DK-A3IV-01A	Bladder	Primary Tumor
BLCA	Bladder Urothelial Carcinoma	TCGA-DK-A3WX	TCGA-DK-A3WX-01A	Bladder	Primary Tumor
BLCA	Bladder Urothelial Carcinoma	TCGA-DK-A3WY	TCGA-DK-A3WY-01A	Bladder	Primary Tumor
BLCA	Bladder Urothelial Carcinoma	TCGA-DK-A3X1	TCGA-DK-A3X1-01A	Bladder	Primary Tumor
BLCA	Bladder Urothelial Carcinoma	TCGA-DK-A3X2	TCGA-DK-A3X2-01A	Bladder	Primary Tumor
BLCA	Bladder Urothelial Carcinoma	TCGA-E5-A2PC	TCGA-E5-A2PC-01A	Bladder	Primary Tumor
BLCA	Bladder Urothelial Carcinoma	TCGA-E7-A3X6	TCGA-E7-A3X6-01A	Bladder	Primary Tumor
BLCA	Bladder Urothelial Carcinoma	TCGA-E7-A3Y1	TCGA-E7-A3Y1-01A	Bladder	Primary Tumor
BLCA	Bladder Urothelial Carcinoma	TCGA-FD-A3B3	TCGA-FD-A3B3-01A	Bladder	Primary Tumor
BLCA	Bladder Urothelial Carcinoma	TCGA-FD-A3B4	TCGA-FD-A3B4-01A	Bladder	Primary Tumor
BLCA	Bladder Urothelial Carcinoma	TCGA-FD-A3B4	TCGA-FD-A3B4-10A	Bladder	Blood Derived Normal
BLCA	Bladder Urothelial Carcinoma	TCGA-FD-A3B6	TCGA-FD-A3B6-01A	Bladder	Primary Tumor
BLCA	Bladder Urothelial Carcinoma	TCGA-FD-A3B7	TCGA-FD-A3B7-01A	Bladder	Primary Tumor
BLCA	Bladder Urothelial Carcinoma	TCGA-FD-A3B8	TCGA-FD-A3B8-01A	Bladder	Primary Tumor
BLCA	Bladder Urothelial Carcinoma	TCGA-FD-A3N5	TCGA-FD-A3N5-01A	Bladder	Primary Tumor
BLCA	Bladder Urothelial Carcinoma	TCGA-FD-A3N6	TCGA-FD-A3N6-01A	Bladder	Primary Tumor
BLCA	Bladder Urothelial Carcinoma	TCGA-FD-A3NA	TCGA-FD-A3NA-01A	Bladder	Primary Tumor
BLCA	Bladder Urothelial Carcinoma	TCGA-FD-A3SJ	TCGA-FD-A3SJ-01A	Bladder	Primary Tumor
BLCA	Bladder Urothelial Carcinoma	TCGA-FD-A3SL	TCGA-FD-A3SL-01A	Bladder	Primary Tumor
BLCA	Bladder Urothelial Carcinoma	TCGA-FD-A3SN	TCGA-FD-A3SN-01A	Bladder	Primary Tumor
BLCA	Bladder Urothelial Carcinoma	TCGA-FD-A3SP	TCGA-FD-A3SP-01A	Bladder	Primary Tumor
BLCA	Bladder Urothelial Carcinoma	TCGA-FD-A3SQ	TCGA-FD-A3SQ-01A	Bladder	Primary Tumor
BLCA	Bladder Urothelial Carcinoma	TCGA-FD-A3SR	TCGA-FD-A3SR-01A	Bladder	Primary Tumor
BLCA	Bladder Urothelial Carcinoma	TCGA-FD-A3SS	TCGA-FD-A3SS-01A	Bladder	Primary Tumor
BLCA	Bladder Urothelial Carcinoma	TCGA-FT-A3EE	TCGA-FT-A3EE-01A	Bladder	Primary Tumor
BLCA	Bladder Urothelial Carcinoma	TCGA-G2-A2EC	TCGA-G2-A2EC-01A	Bladder	Primary Tumor
BLCA	Bladder Urothelial Carcinoma	TCGA-G2-A2EF	TCGA-G2-A2EF-01A	Bladder	Primary Tumor
BLCA	Bladder Urothelial Carcinoma	TCGA-G2-A2EJ	TCGA-G2-A2EJ-01A	Bladder	Primary Tumor
BLCA	Bladder Urothelial Carcinoma	TCGA-G2-A2EK	TCGA-G2-A2EK-01A	Bladder	Primary Tumor
BLCA	Bladder Urothelial Carcinoma	TCGA-G2-A2EL	TCGA-G2-A2EL-01A	Bladder	Primary Tumor
BLCA	Bladder Urothelial Carcinoma	TCGA-G2-A2ES	TCGA-G2-A2ES-01A	Bladder	Primary Tumor
BLCA	Bladder Urothelial Carcinoma	TCGA-G2-A3IB	TCGA-G2-A3IB-01A	Bladder	Primary Tumor
BLCA	Bladder Urothelial Carcinoma	TCGA-G2-A3IE	TCGA-G2-A3IE-01A	Bladder	Primary Tumor
BLCA	Bladder Urothelial Carcinoma	TCGA-G2-A3VY	TCGA-G2-A3VY-01A	Bladder	Primary Tumor
BLCA	Bladder Urothelial Carcinoma	TCGA-GC-A3BM	TCGA-GC-A3BM-01A	Bladder	Primary Tumor
BLCA	Bladder Urothelial Carcinoma	TCGA-GC-A3I6	TCGA-GC-A3I6-01A	Bladder	Primary Tumor
BLCA	Bladder Urothelial Carcinoma	TCGA-GC-A3I6	TCGA-GC-A3I6-10A	Bladder	Blood Derived Normal
BLCA	Bladder Urothelial Carcinoma	TCGA-GC-A3OO	TCGA-GC-A3OO-01A	Bladder	Primary Tumor
BLCA	Bladder Urothelial Carcinoma	TCGA-GC-A3RD	TCGA-GC-A3RD-01A	Bladder	Primary Tumor
BLCA	Bladder Urothelial Carcinoma	TCGA-GC-A3WC	TCGA-GC-A3WC-01A	Bladder	Primary Tumor
BLCA	Bladder Urothelial Carcinoma	TCGA-GD-A2C5	TCGA-GD-A2C5-01A	Bladder	Primary Tumor
BLCA	Bladder Urothelial Carcinoma	TCGA-GD-A3OP	TCGA-GD-A3OP-01A	Bladder	Primary Tumor
BLCA	Bladder Urothelial Carcinoma	TCGA-GD-A3OQ	TCGA-GD-A3OQ-01A	Bladder	Primary Tumor
BLCA	Bladder Urothelial Carcinoma	TCGA-GD-A3OS	TCGA-GD-A3OS-01A	Bladder	Primary Tumor
BLCA	Bladder Urothelial Carcinoma	TCGA-GV-A3JV	TCGA-GV-A3JV-01A	Bladder	Primary Tumor
BLCA	Bladder Urothelial Carcinoma	TCGA-GV-A3JW	TCGA-GV-A3JW-01A	Bladder	Primary Tumor
BLCA	Bladder Urothelial Carcinoma	TCGA-GV-A3JX	TCGA-GV-A3JX-01A	Bladder	Primary Tumor
BLCA	Bladder Urothelial Carcinoma	TCGA-GV-A3JZ	TCGA-GV-A3JZ-01A	Bladder	Primary Tumor
BLCA	Bladder Urothelial Carcinoma	TCGA-GV-A3QF	TCGA-GV-A3QF-01A	Bladder	Primary Tumor
BLCA	Bladder Urothelial Carcinoma	TCGA-GV-A3QG	TCGA-GV-A3QG-01A	Bladder	Primary Tumor
BLCA	Bladder Urothelial Carcinoma	TCGA-GV-A3QH	TCGA-GV-A3QH-01A	Bladder	Primary Tumor
BLCA	Bladder Urothelial Carcinoma	TCGA-H4-A2HQ	TCGA-H4-A2HQ-01A	Bladder	Primary Tumor
BLCA	Bladder Urothelial Carcinoma	TCGA-HQ-A2OE	TCGA-HQ-A2OE-01A	Bladder	Primary Tumor
BLCA	Bladder Urothelial Carcinoma	TCGA-K4-A3WS	TCGA-K4-A3WS-01A	Bladder	Primary Tumor
BLCA	Bladder Urothelial Carcinoma	TCGA-K4-A3WV	TCGA-K4-A3WV-01A	Bladder	Primary Tumor
