# Supplementary material for: A virome-wide clonal integration analysis platform for discovering cancer viral etiology
Source: HighWire-hosted journal article supplement (doi:10.1101/gr.242529.118), 2019-03-14
Supplement: Supplemental_Table_S20.xlsx [file Supplemental_Table_S20.xlsx]

## Sheet: Supplemental Table S20
Supplemental Table S20 List of tumor and matched normal tissues (for viral integration positive sample) of 12 analyzed CGCI non-Hodgkin lymphoma samples
Study name	Project name	BioProject	Sequencing type	Patient name reported by Morin et al., 2011	Submitted subject id	BioSample	Run	Body site	Is_tumor	Sex
CGCI: Non-Hodgkin Lymphoma	DLBCL	PRJNA172563	WGS	05-23110/DLBCL-PatientD	05-23110	SAMN00672820	SRR316129	LYMPH NODE	Yes	female
CGCI: Non-Hodgkin Lymphoma	DLBCL	PRJNA172563	WGS	06-11535/DLBCL-PatientJ	06-11535	SAMN00672716	SRR390360	LYMPH NODE	Yes	female
CGCI: Non-Hodgkin Lymphoma	DLBCL	PRJNA172563	WGS	06-22057/DLBCL-PatientK	06-22057	SAMN00672717	SRR390363	BREAST	Yes	female
CGCI: Non-Hodgkin Lymphoma	DLBCL	PRJNA172563	WGS	98-22532/DLBCL-PatientE	98-22532	SAMN00672726	SRR390366	LYMPH NODE	Yes	male
CGCI: Non-Hodgkin Lymphoma	DLBCL	PRJNA172563	WGS	05-25439/DLBCL-PatientL	05-25439	SAMN00672728	SRR390368	LYMPH NODE	Yes	male
CGCI: Non-Hodgkin Lymphoma	DLBCL	PRJNA172563	WGS	06-19919/DLBCL-PatientF	06-19919	SAMN00672729	SRR390369	LYMPH NODE	Yes	male
CGCI: Non-Hodgkin Lymphoma	DLBCL	PRJNA172563	WGS	05-25674/DLBCL-PatientG	05-25674	SAMN00672730	SRR390370	TONSIL	Yes	female
CGCI: Non-Hodgkin Lymphoma	DLBCL	PRJNA172563	WGS	06-15256/DLBCL-PatientH	06-15256	SAMN00672732	SRR390372	LYMPH NODE	Yes	male
CGCI: Non-Hodgkin Lymphoma	DLBCL	PRJNA172563	WGS	06-14634/DLBCL-PatientC	06-14634	SAMN00672738	SRR390378	LYMPH NODE	Yes	male
CGCI: Non-Hodgkin Lymphoma	DLBCL	PRJNA172563	WGS	09-33003/DLBCL-PatientM	09-33003	SAMN00672826	SRR390382	LYMPH NODE	Yes	male
CGCI: Non-Hodgkin Lymphoma	DLBCL	PRJNA172563	WGS	09-33003/DLBCL-PatientM	09-33003	SAMN00672827	SRR390383	PERIPHERAL BLOOD	No	male
CGCI: Non-Hodgkin Lymphoma	DLBCL	PRJNA172563	WGS	08-15460/DLBCL-PatientB	08-15460	SAMN00737837	SRR598754	LYMPH NODE	Yes	female
CGCI: Non-Hodgkin Lymphoma	DLBCL	PRJNA172563	WGS	05-12939/DLBCL-PatientI	05-12939	SAMN00672731	SRR766829	LYMPH NODE	Yes	male
Note: A total of 13 patient samples were previously reported by Morin et al., 2011, but the WGS data of one sample "04-11156" was not available in the dbGaP phs000532. Thus, we did not include it in our study.
