# Supplementary material for: A virome-wide clonal integration analysis platform for discovering cancer viral etiology
Source: HighWire-hosted journal article supplement (doi:10.1101/gr.242529.118), 2019-03-14
Supplement: Supplemental_Table_S21.xlsx [file Supplemental_Table_S21.xlsx]

## Sheet: Supplemental Table S21
Supplemental Table S21 List of tumor and matched normal tissues (for viral integration positive sample) of 29 analyzed TCGA stomach adenocarcinoma samples
Project ID	Disease type	Submitter id	Sample submitter id	Primary site	Tissue type
STAD	Stomach Adenocarcinoma	TCGA-B7-5818	TCGA-B7-5818-01A	Stomach	Primary Tumor
STAD	Stomach Adenocarcinoma	TCGA-BR-4191	TCGA-BR-4191-01A	Stomach	Primary Tumor
STAD	Stomach Adenocarcinoma	TCGA-BR-4253	TCGA-BR-4253-01A	Stomach	Primary Tumor
STAD	Stomach Adenocarcinoma	TCGA-BR-4255	TCGA-BR-4255-01A	Stomach	Primary Tumor
STAD	Stomach Adenocarcinoma	TCGA-BR-4256	TCGA-BR-4256-01A	Stomach	Primary Tumor
STAD	Stomach Adenocarcinoma	TCGA-BR-4369	TCGA-BR-4369-01A	Stomach	Primary Tumor
STAD	Stomach Adenocarcinoma	TCGA-BR-6452	TCGA-BR-6452-01A	Stomach	Primary Tumor
STAD	Stomach Adenocarcinoma	TCGA-BR-6456	TCGA-BR-6456-01A	Stomach	Primary Tumor
STAD	Stomach Adenocarcinoma	TCGA-BR-6706	TCGA-BR-6706-01A	Stomach	Primary Tumor
STAD	Stomach Adenocarcinoma	TCGA-BR-8381	TCGA-BR-8381-01A	Stomach	Primary Tumor
STAD	Stomach Adenocarcinoma	TCGA-CG-4304	TCGA-CG-4304-01A	Stomach	Primary Tumor
STAD	Stomach Adenocarcinoma	TCGA-CG-4462	TCGA-CG-4462-01A	Stomach	Primary Tumor
STAD	Stomach Adenocarcinoma	TCGA-CG-4465	TCGA-CG-4465-01A	Stomach	Primary Tumor
STAD	Stomach Adenocarcinoma	TCGA-CG-4466	TCGA-CG-4466-01A	Stomach	Primary Tumor
STAD	Stomach Adenocarcinoma	TCGA-CG-4472	TCGA-CG-4472-01A	Stomach	Primary Tumor
STAD	Stomach Adenocarcinoma	TCGA-CG-5717	TCGA-CG-5717-01A	Stomach	Primary Tumor
STAD	Stomach Adenocarcinoma	TCGA-CG-5720	TCGA-CG-5720-01A	Stomach	Primary Tumor
STAD	Stomach Adenocarcinoma	TCGA-CG-5723	TCGA-CG-5723-01A	Stomach	Primary Tumor
STAD	Stomach Adenocarcinoma	TCGA-CG-5725	TCGA-CG-5725-01A	Stomach	Primary Tumor
STAD	Stomach Adenocarcinoma	TCGA-D7-5578	TCGA-D7-5578-01A	Stomach	Primary Tumor
STAD	Stomach Adenocarcinoma	TCGA-D7-6525	TCGA-D7-6525-01A	Stomach	Primary Tumor
STAD	Stomach Adenocarcinoma	TCGA-D7-6527	TCGA-D7-6527-01A	Stomach	Primary Tumor
STAD	Stomach Adenocarcinoma	TCGA-D7-6815	TCGA-D7-6815-01A	Stomach	Primary Tumor
STAD	Stomach Adenocarcinoma	TCGA-D7-8570	TCGA-D7-8570-01A	Stomach	Primary Tumor
STAD	Stomach Adenocarcinoma	TCGA-D7-A4YX	TCGA-D7-A4YX-01A	Stomach	Primary Tumor
STAD	Stomach Adenocarcinoma	TCGA-HF-7136	TCGA-HF-7136-01A	Stomach	Primary Tumor
STAD	Stomach Adenocarcinoma	TCGA-HU-8608	TCGA-HU-8608-01A	Stomach	Primary Tumor
STAD	Stomach Adenocarcinoma	TCGA-HU-A4G6	TCGA-HU-A4G6-01A	Stomach	Primary Tumor
STAD	Stomach Adenocarcinoma	TCGA-CD-5801	TCGA-CD-5801-01A	Stomach	Primary Tumor
STAD	Stomach Adenocarcinoma	TCGA-CD-5801	TCGA-CD-5801-10A	Stomach	Blood Derived Normal
